# Supplementary material for: Lead-free BaTiO3nanowires-based flexible nanocomposite generator
Source: Royal Society of Chemistry journal article supplement (doi:10.1039/c4nr02246g), 2014-06-03
Supplement: c4nr02246g1.pdf [file c4nr02246g1.pdf]

**Electronic Supplementary Information for:**

**Lead-free BaTiO<sub>3</sub> nanowires-based flexible nanocomposite generator**

---

Kwi-Il Park\*, Soo Bin Bae, Seong Ho Yang, Hyung Ik Lee, Kisu Lee, and Seung Jun Lee

The 4th Research and Development Institute-3, Agency for Defense Development, Yuseong  
P.O. Box 35, Daejeon 305-600, Republic of Korea

\*e-mail: kipark@add.re.kr, (Phone) +82-42-821-4336, (Fax) +82-42-823-3400-16250

---

**This PDF file includes:**

Figures S1 and S2.

**Other Electronic Supplementary Information for this manuscript**

Video S1.

# Nanoscale

## 1. Linear superposition test results of BaTiO<sub>3</sub> NWs-based NCG device

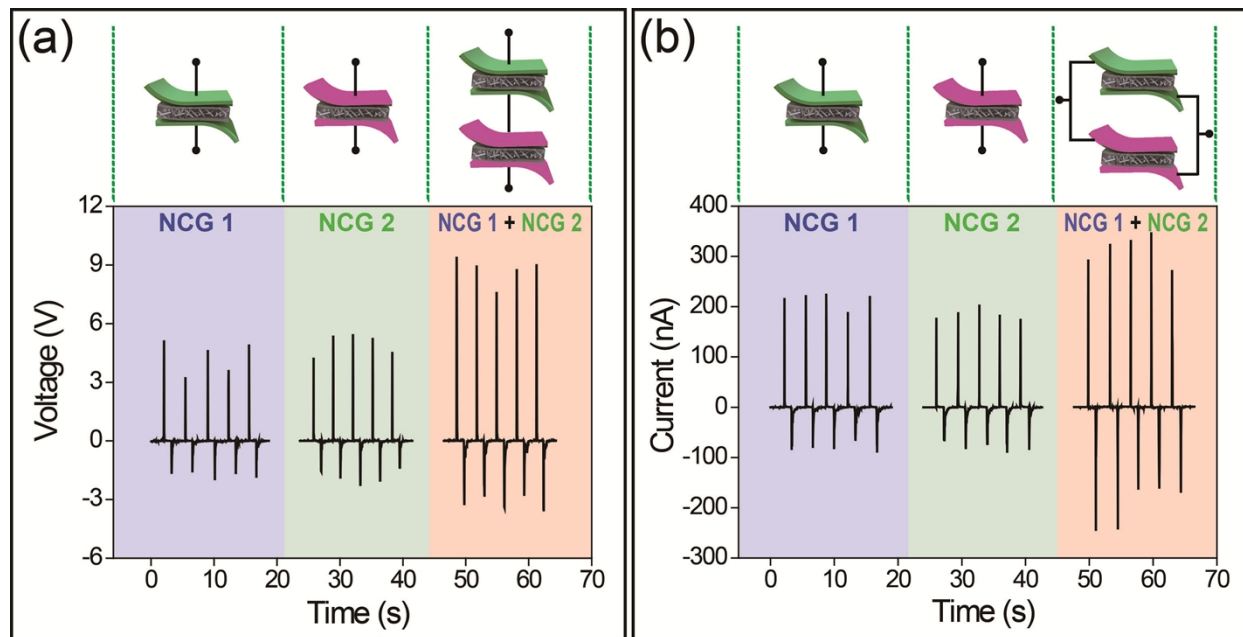

**Fig. S1** The open-circuit voltage (a) and short-circuit current signals (b) generated from two difference NCG devices connected in serial and in parallel, respectively.

# Nanoscale

## 2. Durability test result of BaTiO<sub>3</sub> NWs-based NCG device

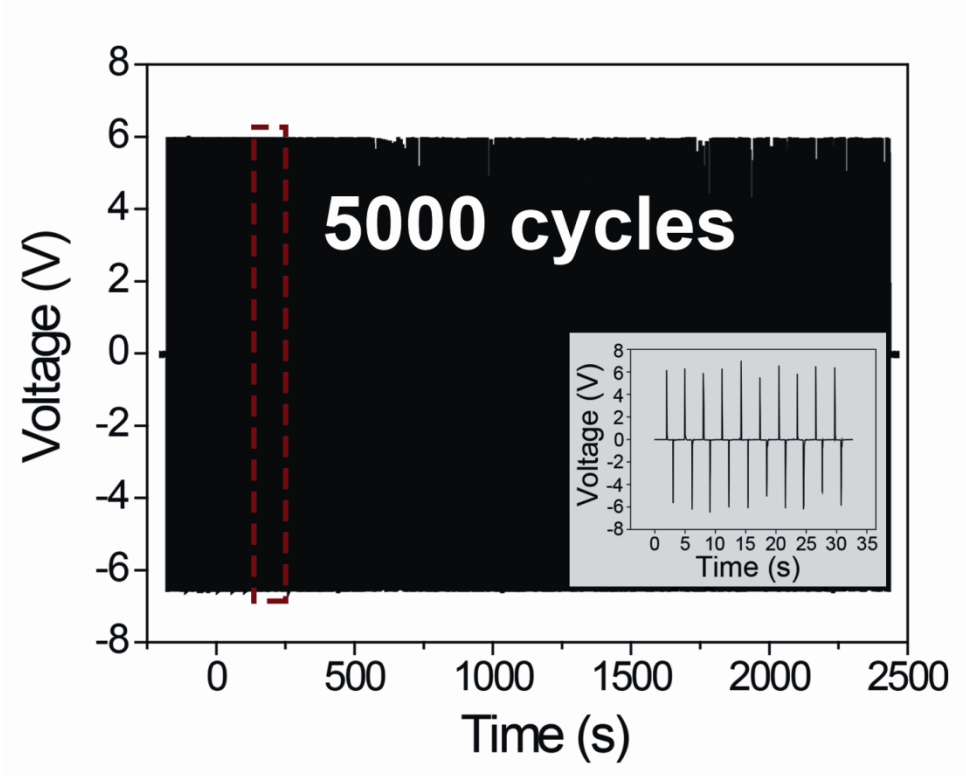

**Fig. S2** The mechanical stability test result of output voltage generated from BaTiO<sub>3</sub> NWs-based NCG device during periodically 5000 bending cycles.

# Nanoscale

## 3. The real-time live view showing an LCD device operated by an NCG device

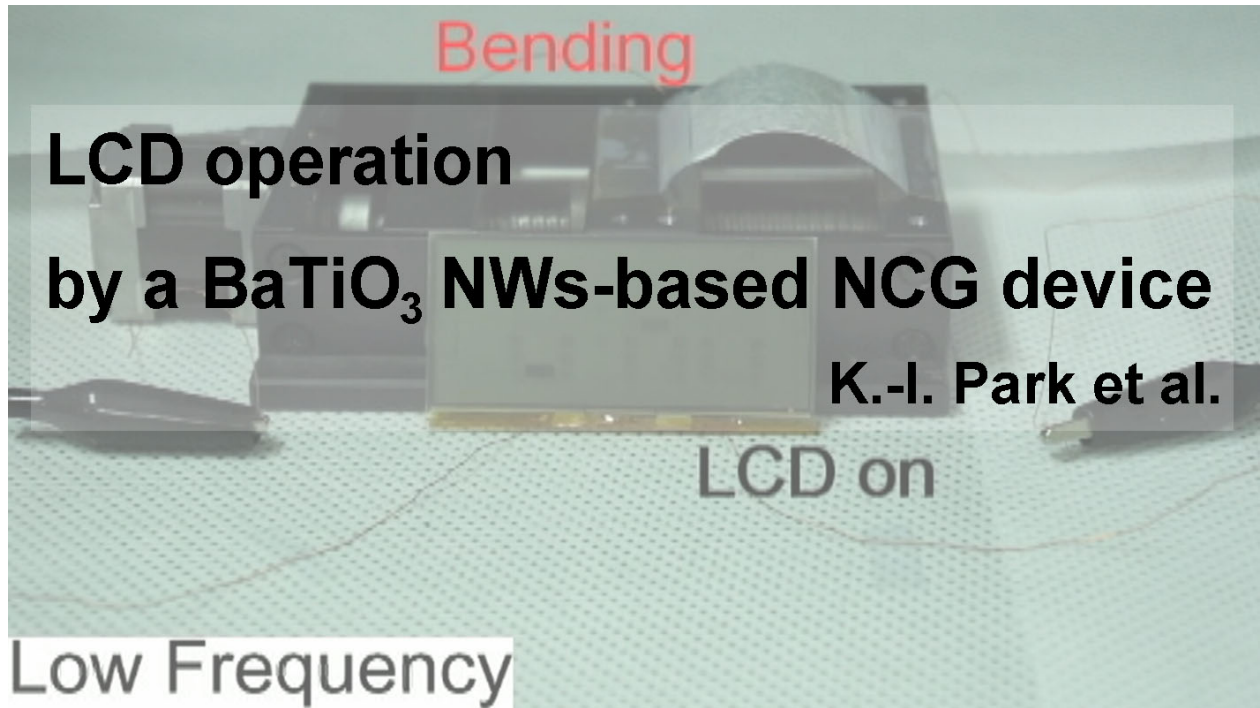

Video S1.
